# Supplementary material for: Simplifying mosquito sampling to estimate community biting exposure and malaria indoor vector control impact
Source: Research Square preprint supplement (doi:10.21203/rs.3.rs-7065171/v1), 2025-07-15
Supplement: Supplementary file 1 [file 1cbf7efb23d9fd0d270903de.pdf]

1

## 2

4

9

10

## 11 1 Resumo (Abstract in Portuguese)

12 Mosquiteiros impregnados com inseticidas de longa duração (MILD) são mais  
13 eficazes contra a malária quando os mosquitos tentam picar indivíduos enquanto  
14 estão deitados na cama. No entanto, a complexidade do rastreamento da ativi-  
15 dade de picada dos mosquitos dificulta a quantificação de uma métrica essen-  
16 cial — a proporção de picadas ocorridas enquanto o indivíduo está deitado  
17 na cama. Neste trabalho, testou-se a confiabilidade de um método simplifi-  
18 cado de amostragem de picada de mosquitos em comparação com os valores  
19 obtidos de uma revisão sistemática publicada. Utilizando esta metodologia no  
20 arquipélago dos Bijagós, uma área remota e endêmica para malária da Guiné  
21 Bissau, estimou-se que esta proporção é de 0,95 (Intervalo de credibilidade de  
22 95%, CrI: 0,84, 1,00). Assumindo um cenário semelhante ao dos Bijagós, o mod-  
23 elo de transição aplicado sugere que as redes impregnadas apenas com pestici-  
24 das piretroides podem evitar 86% dos casos clínicos de *Plasmodium falciparum*  
25 em crianças com menos de 5 anos (95% CrI: 77, 89%), em comparação com a  
26 ausência de MILDs. Devido às atividades agrícolas típicas da região, alguns  
27 residentes do arquipélago dormem sem MILDs em abrigos temporários ao ar  
28 livre, o que poderia reduzir o impacto projetado a nível populacional em 35%.  
29 A metodologia proposta aumenta a viabilidade do monitoramento do impacto  
30 de intervenções de controle de malária no interior de residências em contextos  
31 com recursos limitados.

## 32 2 Comparing hourly and segmented data collec- 33 tion methods

34 The studies from a systematic review of mosquito biting behaviour and human  
35 activity in Africa [1] that were used to estimate  $\phi_{Bed}$  according to different  
36 sampling methods, are shown in Supplementary Table 1.

37 A sensitivity analysis was conducted to identify scenarios in which the seg-  
38 mented method may lead to inaccurate estimates of  $\phi_{Bed}$ . The segmented  
39 method assumes that the mean proportion of people indoors and in bed in  
40 each time segment adequately represents the underlying human activity in that  
41 segment, and this drives differences in  $\phi_{Bed}$  estimates derived by the methods.

42 For each of the eight studies in the systematic review [1] with paired mosquito  
43 and human activity data, four scenarios were explored in which the time when  
44 people enter the house for the night, go to bed, get out of bed and leave the  
45 house in the morning was delayed by 1 hour, 2 hours, 3 hours and 6 hours,  
46 whilst holding the mosquito data constant. The hourly and segmented values  
47 of  $\phi_{Bed}$  were re-estimated for each of these scenarios.

Supplementary Table 1: **References for studies mosquito biting behaviour and human sleeping pattern data, as found in a previously conducted systematic review [1].** The sleeping pattern datasets used to generate uncertainty in the proportion of bites taken when people are in bed ( $\phi_{Bed}$ ) are identified.

| Entomological data reference | Entomological context description                                              | Human data reference (for segmented estimate) | Human data reference (for hourly estimate considering full range from all human activity studies) |
|------------------------------|--------------------------------------------------------------------------------|-----------------------------------------------|---------------------------------------------------------------------------------------------------|
| Code                         | Kenya: <i>An. arabiensis</i> ; June 2011-May 2012                              | [2]                                           |                                                                                                   |
| GeisbühlerA                  | Tanzania: <i>An. gambiae</i> s.s.; April-June 2006                             | [4]                                           |                                                                                                   |
| GeisbühlerB                  | Tanzania: <i>An. arabiensis</i> ; April-June 2006                              | [4]                                           |                                                                                                   |
| GeisbühlerC                  | Tanzania: <i>An. gambiae</i> s.l.; April-June 2006                             | [4]                                           |                                                                                                   |
| GeisbühlerD                  | Tanzania: <i>An. gambiae</i> s.l.; April-June 2006                             | [4]                                           |                                                                                                   |
| SeyoumB                      | Zambia: <i>An. quadrimaculatus</i> ; September 2009-March 2010; ITN only site  | [6]                                           | Proportion in bed [2-7]; Proportion indoors [2, 4, 6, 8-13];                                      |
| SeyoumC                      | Zambia: <i>An. funestus</i> ; September 2009-March 2010; ITN & ITN site        | [6]                                           |                                                                                                   |
| SeyoumD                      | Zambia: <i>An. quadrimaculatus</i> ; September 2009-March 2010; ITN & ITN site | [6]                                           |                                                                                                   |

48  $\phi_{Bed}$  is high if most mosquitoes bite indoors when people are in bed. Delaying  
 49 these human activity times increases asynchrony between mosquito and human  
 50 activity, leading to decreases in both the hourly and segmented estimate of  
 51  $\phi_{Bed}$  (Supplementary Figures 1A-E). The  $R^2$  of the points from the  $y = x$  line  
 52 is shown. The relative difference (%) in  $\phi_{Bed}$  between the segmented and hourly  
 53 estimates were compared for each scenario. We show that the greater the delay,  
 54 the greater the relative difference in the segmented and hourly estimates of  $\phi_{Bed}$ .  
 55 This is because, with larger delays, the estimate of  $\phi_{Bed}$  is smaller. However,  
 56 the  $R^2$  is relatively high across all scenarios. This suggests that although the  
 57 segmented method is less accurate when  $\phi_{Bed}$  is low, this is unlikely to have an  
 58 impact on epidemiological interpretation. The relative difference in the estimate  
 59 is smallest if most biting happens when most people are in bed, shown in Figure  
 60 2

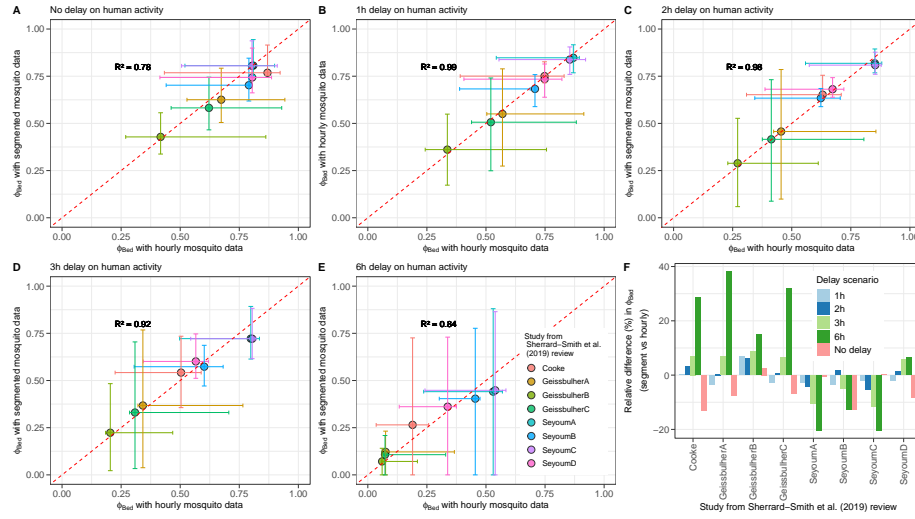

Supplementary Figure 1: **Sensitivity analysis on segmented sampling method.** The time at which people go indoors for the night, go to bed, get out of bed and leave the house in the morning was delayed by 1 hours, 2 hours, 3 hours and 6 hours to determine the influence of the synchrony between mosquito and human activity on the accuracy of the segmented method for estimating  $\phi_{Bed}$ . A) For each scenario, the  $R^2$  for the  $y = x$  line is shown. B) The relative difference (%) in  $\phi_{Bed}$  for each scenario. The greatest relative difference is in the 6h delay scenario, indicating that greater levels of asynchrony between human and mosquito activity introduces more error into the estimates of  $\phi_{Bed}$  from the segmented method.

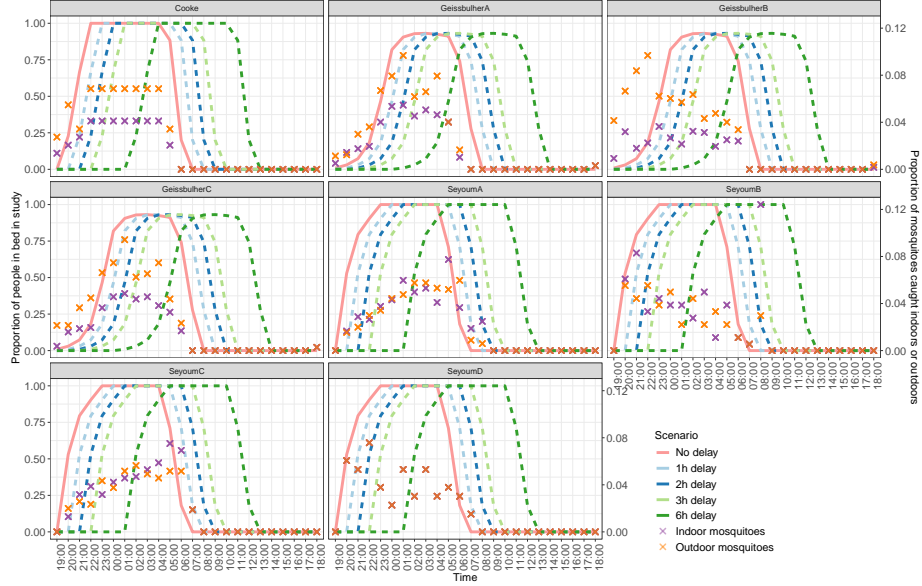

Supplementary Figure 2: **The proportion of mosquitoes indoors and outdoors and proportion of people in bed for each delay scenario in the studies from the published systematic review [1].** Delays were applied to the proportion of people indoors and in bed as recorded in the studies, by 1 hour, 2 hours, 3 hours and 6 hours. The proportion of people in bed in these scenarios is shown on the y-axis (left-hand side). The secondary axis (right-hand side) shows the proportion of mosquitoes caught indoors or outdoors, as recorded in the corresponding studies.

### 3 Malaria transmission model

#### 3.1 Model structure and vector control interventions

A mechanistic of malaria transmission was used to simulate transmission in a Bijagos-like setting [14, 15]. In this study, the model is used to determine the influence of different values of  $\phi_{Bed}$  on clinical incidence of *P. falciparum* infection in children under 5-years of age per 1,000 persons. The model structure is described in detail in Supplementary Material of the original transmission model paper [14]. Here, we provide a brief overview of the model structure and focus on the implementation of ITNs in this framework.

The human component of this malaria model consists of 6 states of infection/disease. Each state is separated into different biting heterogeneity groups (capturing differences in the risk of exposure to infectious bites), divided into 20 age groups and into intervention groups, depending on the usage of the in-

74 intervention by the population. Naturally acquired immunity parameters were  
 75 previously fitted to capture age-specific epidemiological trends in different set-  
 76 tings [16]. Once an individual has received an infectious bite, the probability of  
 77 developing symptoms is dependent on immunity, which in turn is determined  
 78 by the age and level of exposure in the population. The force of infection from  
 79 mosquitoes to humans is dependent on, amongst other factors, the number of  
 80 infectious vectors. The human model is illustrated in Supplementary Figure 3.

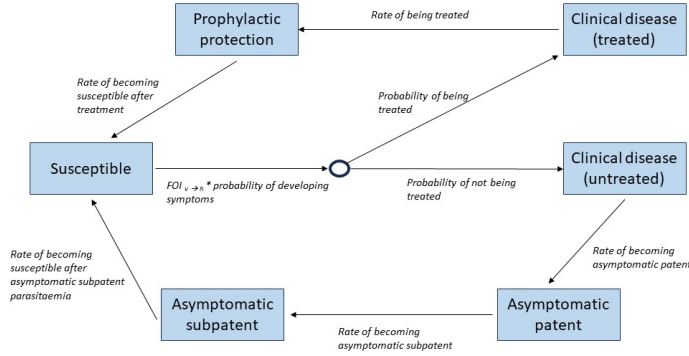

Supplementary Figure 3: **Schematic of the modelling structure of the human malaria model (adapted from Supplementary Material 1.1 [17].**  $FOI_{v \rightarrow h}$  denotes the force of infection on humans from mosquitoes.

81 Malaria infection in mosquitoes is modelled in three states; susceptible (S),  
 82 pre-infectious (E) and infectious (I) mosquitoes. Mosquitoes become infected  
 83 upon biting an infectious person, according to the force of infection from humans  
 84 to vectors ( $\Lambda M^v$ , see Supplementary Equation 8). Mosquitoes surviving the  
 85 extrinsic incubation period (EIP) become infectious and are able to transmit  
 86 malaria to humans upon biting. The emergence of adult mosquitoes is influenced  
 87 by a density-dependent process in larval populations. The per capita mortality  
 88 rate of mosquitoes is modelled by an exponential distribution (mean mortality  
 89 rate = 0.1).

90 ITNs protect individuals through three mechanisms: i) direct protection by  
 91 a barrier effect; ii) indirect protection by killing mosquitoes and iii) a commu-  
 92 nity impact by deterring mosquitoes from entering houses and thus increasing  
 93 the time between human bloodmeals. Subsequently, ITN can reduce malaria  
 94 prevalence in the population.

95 In each mosquito feeding attempt, mosquitoes can be killed or repelled by  
 96 an ITN, or successfully take a bloodmeal. This is illustrated in Supplementary  
 97 Figure 4. The probability of each of these outcomes depends on aspects of  
 98 mosquito bionomics; the human blood index ( $Q_0$ ) and the proportion of bites  
 99 taken when people are in bed ( $\phi_{Bed}$ ). Mosquitoes which are repelled attempt  
 100 to feed elsewhere and repeat the feeding attempt process. It is assumed that  
 101 all bites indoors are on people (the model assumes that all livestock are kept  
 102 outdoors), therefore  $\phi_{Bed}$  is a reflection of the proportion of bites taken on  
 103 humans, when they are in bed. This process is described in detail elsewhere  
 104 [18].

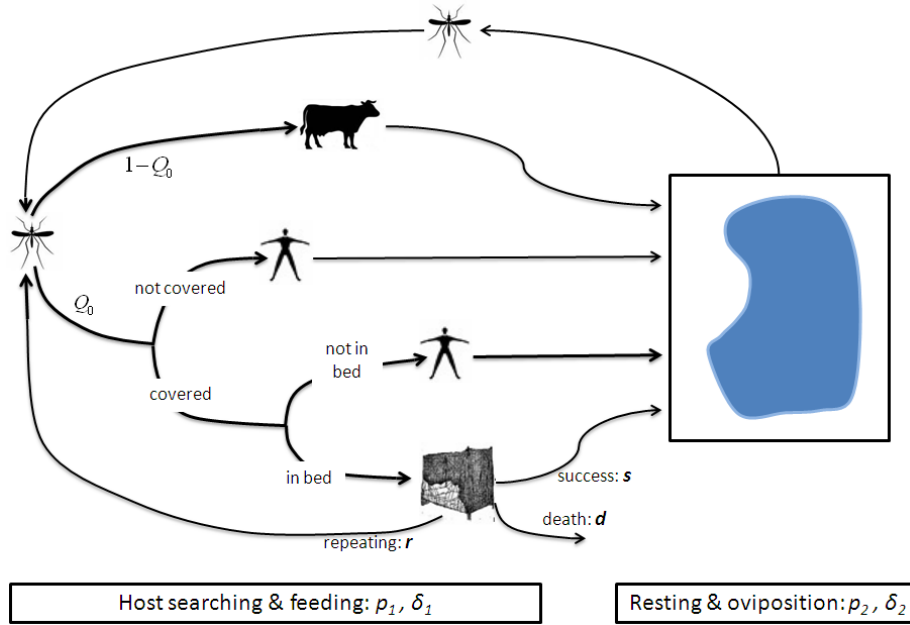

Supplementary Figure 4: **Schematic of the mosquito feeding cycle, from  
 Supplementary Figure 2.1 [14].** These authors adapted a diagram from a  
 previous study [18].

105 As summarised in Supplementary Information 2 [14], if person  $i$  is protected  
 106 by an ITN, then the probability that vector species  $v$  bites host  $i$  during a single  
 107 feeding attempt is  $y_i^v$ ; the probability the mosquito vector bites and survives  
 108 the feeding attempt is  $w_i^v$  and the probability it is repelled without feeding is  
 109  $z_i^v$ . For an individual without protection,  $y_i^v = w_i^v = 1$  and  $z_i^v = 0$  as these  
 110 probabilities do not include natural vector mortality. As not all mosquitoes  
 111 will successfully feed upon entering a house, these probabilities consider feeding  
 112 behaviour of mosquitoes prior to the introduction of insecticides. However, it is  
 113 difficult to characterise this aspect of mosquito bionomics given the widespread

usage of ITN, therefore in this study, the estimate of  $\phi_{Bed}$  used to parameterise the model is derived from mosquito surveillance in a setting with high ITN usage.

During a single feeding attempt (on either humans or animals), species  $v$  will successfully feed with probability  $W^v$ , where  $Q_0^v$  is the human blood index (in the absence of interventions) and  $\pi_i$  is the proportion of bites on humans that person  $i$  receives, also in the absence of interventions:

$$W^v = (1 - Q_0^v) + Q_0^v \sum_i \pi_i w_i^v \quad (1)$$

The probability the mosquito is repelled is given by probability  $Z^v$ :

$$Z^v = Q_0^v \sum_i \pi_i z_i^v \quad (2)$$

$Z$  and  $W$  refer to the average probability of the mosquito repeating and successfully feeding on human during a single feeding attempt, respectively.

Mosquitoes search for bloodmeals for time  $\delta_1^v$  and rest for time  $\delta_2^v$ , respectively. Subsequently, the mosquito feeding rate ( $f_R^v$ ) is  $f_R^v = \frac{1}{\delta_1^v + \delta_2^v}$ . It is assumed that  $\delta_2^v$  is unaffected by interventions, whilst the time searching for a bloodmeal increases to  $\delta_1^v = \frac{\delta_{10}^v}{1 - Z^v}$ . Here,  $\delta_{10}^v$  is the duration of foraging in the absence of interventions.

Each mosquito survives the period of feeding and resting with probability  $p_1^v$  and  $p_2^v$ . In the absence of interventions, the probability of a mosquito feeding is given by  $p_{10}^v = \exp(-\mu_0 \delta_{10})$  and of resting is given by  $p_2^v = \exp(-\mu_0^v \delta_2)$ . Here,  $\mu_0^v$  is the natural death rate of mosquitoes. In the presence of interventions,  $p_2^v$  is unchanged but  $p_1^v = \frac{p_{10}^v w^v}{1 - Z^v p_{10}^v}$ .

The probability of surviving a feeding cycle is  $p_1^v p_2^v = \exp(\frac{-\mu^v}{f_R^v})$ . The mosquito death rate  $\mu_v$  is then given by the following equation:

$$\mu_v = -f_R^v \log(p_1^v p_2^v) \quad (3)$$

The probability that a feeding cycle ends with a successful bite on a person,  $q_i^v$  is given by:

$$q_i^v = \frac{p_{10}^v Q_0^v \pi_i w_i^v}{1 - Z^v p_{10}^v} \quad (4)$$

The probability that a feeding cycle ends with a bite on an animal is given by:

$$q_A^v = \frac{p_{10}^v (1 - Q_0^v)}{1 - Z^v p_{10}^v} \quad (5)$$



Subsequently, the proportion of successful bites on humans in the presence of interventions is given by:

$$Q^v = 1 - \frac{(1 - Q_0^v)}{W^v} \quad (6)$$

The biting rate on humans is summarised as  $\alpha^v = Q^v f_R^v$ . The rate at which a person is bitten by a mosquito is then given by the following equation:

$$\lambda_i^v = \frac{\alpha^v \pi_i w_i^v}{\sum_i \pi_i w_i^v} \quad (7)$$

The force of infection from humans to vectors is given by the following equation, where  $c_i$  is the infectivity of the infectious state that a person is in:

$$\Lambda M^v = \sum_i c_i \lambda_i^v \quad (8)$$

The EIR experienced by each person due to the mosquito is  $\lambda_i^v * I_M^v$ , where  $I_M^v$  is the number of infectious vectors. The total experienced by people is the sum of this over all species.

The degree of protection offered by an ITN is dependent on the proportion of bites that mosquitoes take on humans when they are potentially protected by the intervention, i.e. when they are in bed. This is defined in the main text as  $\phi_{Bed}$  (Equation 9).

Upon entering a house with an ITN, a mosquito can repeat a feeding attempt ( $r_N$ ), successfully feed ( $s_N$ ) or die ( $d_N$ ). For an unprotected individual, the probability of biting ( $y_i$ ) and successfully feeding ( $w_i$ ) are equal to 1, and the probability of being repelled ( $z_i$ ) is equal to zero. However, in the presence of interventions, these probabilities are modified, as shown in the following equations:

$$w_i = (1 - \phi_{Bed}) + \phi_{Bed} s_N \quad (9)$$

$$y_i = (1 - \phi_{Bed}) + \phi_{Bed} s_N \quad (10)$$

$$z_i = \phi_{Bed} r_N \quad (11)$$

The repellency effect of the insecticide on an ITN decreases over time from a maximum level of  $r_{N0}$  to  $r_{NM}$ . The repellency effect does not decay to a zero value as ITNs still offer protection (barrier effect) when all insecticide has worn off. The killing effect of the net ( $d_{N0}$ ) decreases at a constant rate ( $\gamma_N$ ). Therefore at time  $t$  after nets were distributed,  $r_N$ ,  $d_N$  and  $s_N$  are given by the following equations:

$$r_N = (r_{N0} - r_{NM})exp(-t\gamma_N) + r_{NM} \quad (12)$$

$$d_N = d_{N0}exp(-t\gamma_N) \quad (13)$$

$$s_N = 1 - r_N - d_N \quad (14)$$

166 The values of  $r_{N0}$  and  $d_{N0}$  vary according to ITN type and the level of insecticide resistance and are estimated from experimental hut trials, using previous  
 167 work [19]. As ITNs cause mosquitoes to repeat the feeding attempt in either of  
 168 two ways (due to the insecticide repelling the mosquitoes or the barrier effect  
 169 of the ITN) and not all mosquitoes will successfully feed on a person without  
 170 interventions, the probability of repeating, feeding and dying are relative to that  
 171 without the intervention. The probabilities for  $r_{N0}$  and  $d_{N0}$  and  $s_{N0}$  are derived  
 172 by:  
 173

$$r_{N0} = (1 - \frac{k'_1}{k'_0})(\frac{j'_1}{j'_1 + l'_1}) \quad (15)$$

$$s_{N0} = \frac{k'_1}{k'_0} \quad (16)$$

$$d_{N0} = (1 - \frac{k'_1}{k'_0})(\frac{l'_1}{j'_1 + l'_1}) \quad (17)$$

174 where  $N_0$  and  $N_1$  are the number of mosquitoes entering a house without  
 175 (subscript 0) and with (subscript 1) an ITN respectively,  $j_0$  and  $j_1$  are the  
 176 percentage of mosquitoes not feeding,  $k_0$  and  $k_1$  are the percentage of mosquitoes  
 177 successfully feeding and  $l_0$  and  $l_1$  are the percentage of mosquitoes dying.

178

### 179 3.2 Modelling transmission in a Bijagos-like setting

180 To simulate transmission in a Bijagos-like setting, the model was parameterised  
 181 to account for local rainfall patterns and the impact that this has on the den-  
 182 sity of mosquitoes over time, using a Fourier series [14]. The archipelago has a  
 183 historic usage of ITNs and a survey on net usage in all 14 villages on Bubaque  
 184 island revealed usage to be 86% [20]. It is assumed that the same ITN usage  
 185 applies throughout the archipelago and for simplicity, that ITN usage does not  
 186 decay over time. In August 2017, it *P. falciparum* prevalence by rapid diagnostic  
 187 test (RDT) was estimated to be approximately 5.8% and by quantitative poly-  
 188 merase chain reaction (qPCR) to be approximately 16.9%, based on a survey  
 189 of the population (6 months-79 years-old in Bubaque island) [21]. We assume  
 190 this translates to a slide prevalence of 5.8% in children under 5-years-old for  
 191 model calibration purposes [22]. The model was calibrated to these data by

running the model for 5 years in the absence of interventions (so that it reaches equilibrium) and introducing ITNs into the population (86% usage), every 3 years, from year 5.5 to year 14.5 (ITNs are typically distributed in June, every 3 years) and determining the initial EIR value that would give a slide prevalence of approximately 5.8% in children under 5-years-old at the time of the 2017 cross-sectional survey.

Data on the phenotypic resistance of local vectors to deltamethrin (55% mortality in WHO test tube assays) was used to determine the probability of a mosquito dying, being repelled or successfully feeding upon contact with an ITN [23]. These probabilities vary depending on ITN type and were previously estimated [19]. Other aspects of mosquito bionomics were used to parameterise the model and are shown in Supplementary Table 2.

The efficacy of ITNs is estimated as the relative (%) of clinical cases of *P. falciparum* in children under 5-years-old averted by ITNs in a 3-year period since the last ITN campaign (year 11.5 to year 14.5), compared to a counterfactual baseline scenario of no interventions (Equation 1).

## 4 Generalised linear mixed effect model to estimate the hourly mosquito biting rate

Different model structures were tested and compared to determine the best-fitting generalised linear negative binomial model to estimate the number of mosquitoes caught in a CDC light trap per hour. Four models, using Markov Chain Monte Carlo, MCMC, (each with 4 chains and 1000 iterations per chain), differing in covariate composition, were explored. All models had the sampling location (indoors or outdoors) and time period (evening, night or day) as fixed effects, as estimating  $\phi_{Bed}$  using the simpler sampling method proposed in this study requires information on the number of mosquitoes indoors and outdoors in each time segment. The  $\log(\text{duration of trapping})$  was used as an offset to account for the duration that each trap was run for and that this was different for different time segments. Leave-one-out cross-validation using a Pareto-k threshold of 0.7 was used to select the best-fitting model. The model comparison statistics are shown in Supplementary Table 3. The best-fitting model is model 1, which has location, time period, the interaction between these variables as fixed effects, and the sampling island as a random effect. The model estimates for the number of mosquitoes caught per trap per hour in each time period and sampling location are shown in Supplementary Table 3. The overdispersion parameter was low, justifying the use of a negative binomial distribution: median = 2.73, 95% CrI: 1.89, 4.00.

Model diagnostics for model 1 were used to assess the chain convergence, by visual inspection of the trace plots (Supplementary Figure 5), the Rhat values

Supplementary Table 2: Reference for values used to parameterise the malaria transmission model to the local entomological context of the Bijagos islands archipelago.

| Entomological parameter                                                                                                                    | Value | Reference    |
|--------------------------------------------------------------------------------------------------------------------------------------------|-------|--------------|
| Human blood index (%)                                                                                                                      | 92    | [14, 24–28]  |
| Duration of extrinsic incubation period (days)                                                                                             | 10    | [14, 29]     |
| Mean life expectancy (days)                                                                                                                | 7.5   | [14, 30–36]  |
| Duration between bloodmeals (days)                                                                                                         | 3     | [14, 37, 38] |
| Time spent foraging (days)                                                                                                                 | 0.68  | [39]         |
| Probability of mosquito dying upon encounter with a new pyrethroid-only ITN in an experimental hut, given a level of resistance            | 0.280 | [19, 23]     |
| Probability of a mosquito being repelled upon encounter with a new pyrethroid-only ITN in an experimental hut, given a level of resistance | 0.680 | [19, 23]     |
| The half-life of insecticide on the pyrethroid-only ITN, given a level of resistance (days)                                                | 832   | [19, 23]     |
| ITN usage (%)                                                                                                                              | 86    | [20]         |

Supplementary Table 3: **Statistics for selecting the best-fitting Bayesian generalised linear model for estimating the number of mosquitoes caught in a CDC light trap per hour.** Statistics are reported in relation to the best-fitting model (model 1). A pareto-k threshold of 0.7 was used for model comparison.

| Model | Fixed Effect                       | Random Effect | ELPD-diff | SE-diff | ELPD-LOO | P-LOO | LOOIC |
|-------|------------------------------------|---------------|-----------|---------|----------|-------|-------|
| 4     | Location + period                  | NA            | -26.1     | 7.6     | -250.9   | 4.5   | 501.9 |
| 3     | Location + period                  | Island        | -2.9      | 3.2     | -227.8   | 9.9   | 455.5 |
| 2     | Location, period + location:period | NA            | -22.7     | 6.8     | -247.5   | 6.4   | 495.1 |
| 1     | Location + period +location:period | Island        | 0.0       | 0.0     | -224.9   | 10.7  | 449.7 |

Supplementary Table 4: **Estimates of the number of mosquitoes caught per trap per hour in each time period and sampling location according to the best-fitting generalised linear mixed effect model (negative binomial distribution).** The fixed effects are time period (day: 7am-7pm, evening: 7pm-10pm and night: 10pm-7am) and sampling location (inside or outside). The random effect is the sampling island.

| Time period | Location | Mean number of mosquitoes caught per trap per hour (95% CrI) |
|-------------|----------|--------------------------------------------------------------|
| Day         | Outside  | 0.02 (0.00, 0.13)                                            |
| Day         | Inside   | 0.02 (0.00, 0.09)                                            |
| Evening     | Outside  | 0.02 (0.00, 0.09)                                            |
| Evening     | Inside   | 0.19 (0.04, 0.60)                                            |
| Night       | Outside  | 0.56 (0.11, 1.82)                                            |
| Night       | Inside   | 0.38 (0.08, 1.22)                                            |

231 (Supplementary Figure 6) and effective sample size (Supplementary Figure 7).

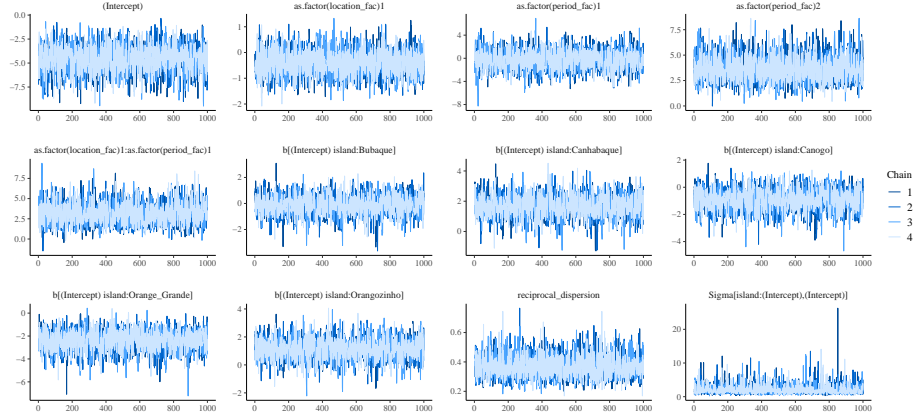

Supplementary Figure 5: **Trace plots of each of the four chains used in the Markov Chain Monte Carlo simulation for the best-fitting Bayesian generalised linear mixed effect model for estimating the number of mosquitoes caught in a CDC light trap per hour** Each chain is shown in a different colour. The overlap of the chains shows similar exploration of parameter space by each chain. Model coefficient abbreviations are as follows: *location\_fac0* = outside, *location\_fac1* = inside, *period\_fac0* = day, *period\_fac1* = evening and *period\_fac2* = night.

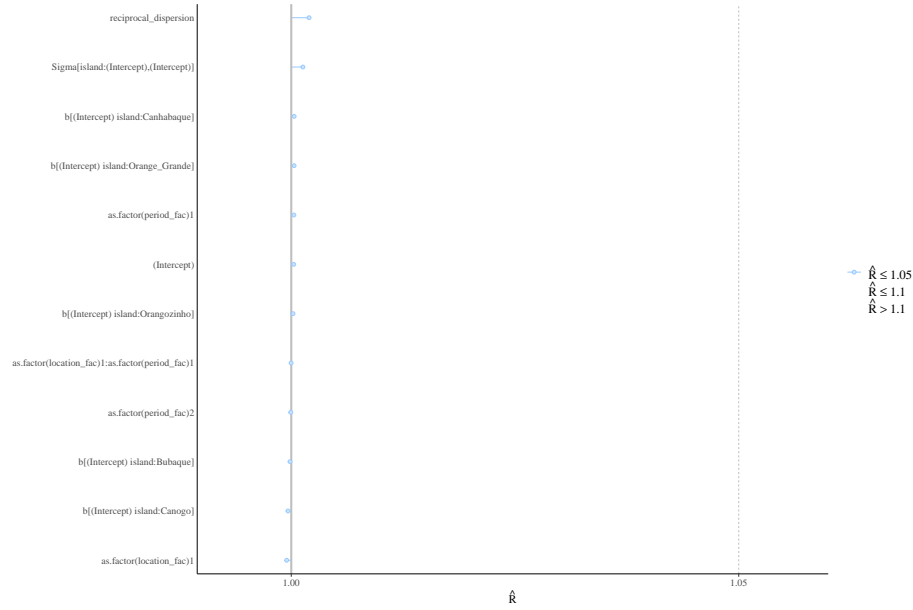

Supplementary Figure 6: **Rhat statistics for Markov Chain Monte Carlo simulations for the best-fitting Bayesian generalised linear mixed effect model for estimating the number of mosquitoes caught in a CDC light trap per hour.** The Rhat is a statistic used to determine whether the chains of the simulation have converged. If all chains are at equilibrium, the split Rhat values will be the same and Rhat will be equal to 1. If the chains have not converged to a common distribution, Rhat will be greater than 1. Model coefficient abbreviations are as follows: *location\_fac0* = outside, *location\_fac1* = inside, *period\_fac0* = day, *period\_fac1* = evening and *period\_fac2* = night.

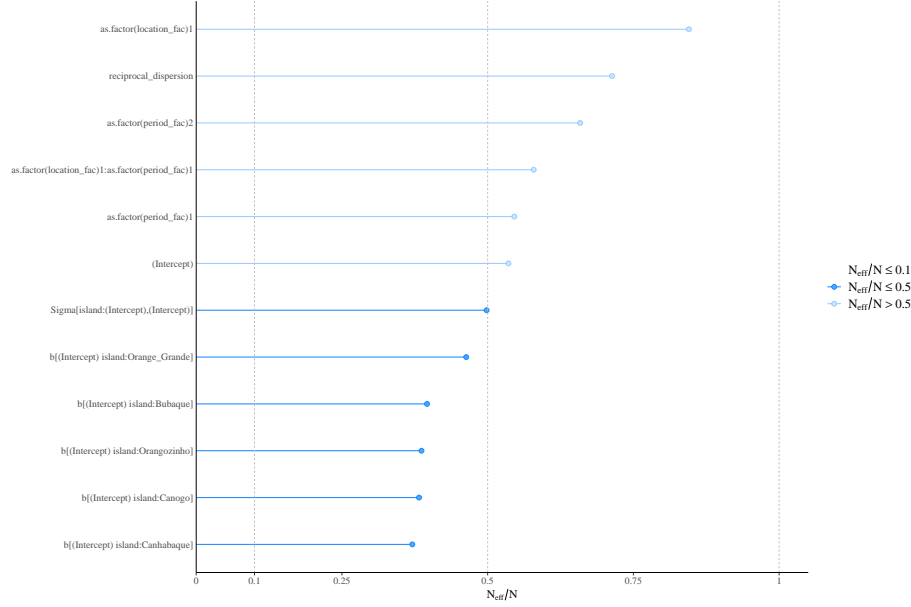

Supplementary Figure 7: **The effective same size statistics for the Markov Chain Monte Carlo simulation for the best-fitting Bayesian generalised linear mixed effect model for estimating the number of mosquitoes caught in a CDC light trap per hour.** Samples will often be autocorrelated within an MCMC chain. The effective sample size (Neff) can be used to estimate the number of independent samples these correlated MCMC samples are equivalent to. If there is no autocorrelation, Neff is equal to the actual number of samples (N). If there is strong autocorrelation, Neff is less than the actual number of samples. A large ratio of Neff to N indicates low autocorrelation between samples and reliable posterior estimates. Model coefficient abbreviations are as follows: *location\_fac0* = outside, *location\_fac1* = inside, *period\_fac0* = day, *period\_fac1* = evening and *period\_fac2* = night.

## 232 5 Generalised binomial logistic regression model 233 to estimate the proportion of people in bed

234 Different model structures were tested and compared to determine the best-  
235 fitting generalised binomial logistic regression model to estimate the proportion  
236 of people in bed in each age group (under 5-years old, 5-14 years-old and over  
237 15-years-old) and time period (day, evening and night). Four models, using  
238 MCMC, (each with 4 chains and 1000 iterations per chain), differing in covariate  
239 composition, were explored. All models had the age group and time period as  
240 fixed effects, as generating an age-weighted estimate of  $\phi_{Bed}$  requires information  
241 on the age-specific proportion of people in bed in each time period. Leave-one-



242 out cross-validation using a Pareto-k threshold of 0.7 was used to select the best-  
243 fitting model. The model comparison statistics are shown in Supplementary  
244 Table 5. The best-fitting model is model 1 (Supplementary Table 6), which has  
245 the age group and time period as fixed effects.

Supplementary Table 5: **Statistics for selecting the best-fitting Bayesian generalised binomial logistic regression model for estimating the age-specific proportion of people in bed in each time period.** Statistics are reported in relation to the best-fitting model (model 1). A pareto-k threshold of 0.7 was used for model comparison.

| Model | Fixed Effect                          | Random Effect | ELPD-diff | SE-diff | ELPD-LOO | P-LOO | LOOIC |
|-------|---------------------------------------|---------------|-----------|---------|----------|-------|-------|
| 4     | Age group + period + age group:period | NA            | -1.7      | 1.5     | -21.1    | 7.1   | 42.4  |
| 3     | Age group + period                    | Island        | -0.8      | 0.7     | -20.4    | 6.4   | 40.7  |
| 2     | Age group + period + age group:period | Island        | -1.7      | 1.2     | -21.3    | 7.9   | 42.6  |
| 1     | Age group + period                    | NA            | 0.0       | 0.0     | -19.6    | 4.8   | 39.1  |

Supplementary Table 6: **Estimates for the proportion of people in bed for each time period and age group according to the best-fitting generalised logistic regression model (binomial distribution).** The fixed effects are time period (Day: 7am-7pm, Evening: 7pm-10pm and Night: 10pm-7am) and age group (under 5-years-old, 5 to 14-years-old and over 15-years-old).

| Time period | Age group         | Mean proportion of people in bed (95% CrI) |
|-------------|-------------------|--------------------------------------------|
| Day         | Under 5-years-old | 0.04 (0.00, 0.18)                          |
| Day         | 5 to 14-years-old | 0.01 (0.00, 0.06)                          |
| Day         | Over 15-years-old | 0.01 (0.00, 0.04)                          |
| Evening     | Under 5-years-old | 0.94 (0.75, 1.00)                          |
| Evening     | 5 to 14-years-old | 0.90 (0.75, 0.98)                          |
| Evening     | Over 15-years-old | 1.00 (0.98, 1.00)                          |
| Night       | Under 5-years-old | 1.00 (0.99, 1.00)                          |
| Night       | 5 to 14-years-old | 1.00 (0.98, 1.00)                          |
| Night       | Over 15-years-old | 1.00 (0.98, 1.00)                          |

Model diagnostics for model 1 were used to assess the chain convergence, by visual inspection of the trace plots (Supplementary Figure 8), the Rhat values (Supplementary Figure 9) and effective sample size (Supplementary Figure 10).

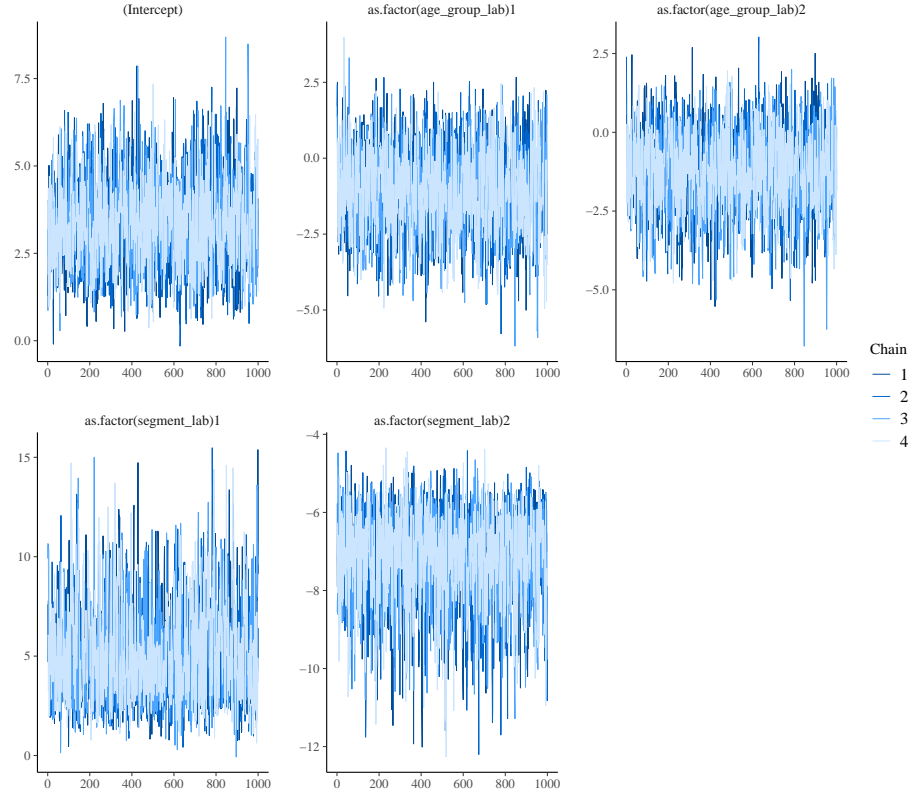

Supplementary Figure 8: **Trace plots of each of the four chains used in the Markov Chain Monte Carlo simulation for the best-fitting generalised logistic regression model for estimating the proportion of people in bed for each age group and time period.** Each chain is shown in a different colour. The overlap of the chains shows similar exploration of parameter space by each chain. Model coefficient abbreviations are as follows: *age\_group\_lab0* = age 0 to 5 years-old, *age\_group\_lab1* = age 5 to 14 years-old, *age\_group\_lab2* = age 15 years-old and over, *segment\_lab0* = day, *segment\_lab1* = evening and *segment\_lab2* = night.

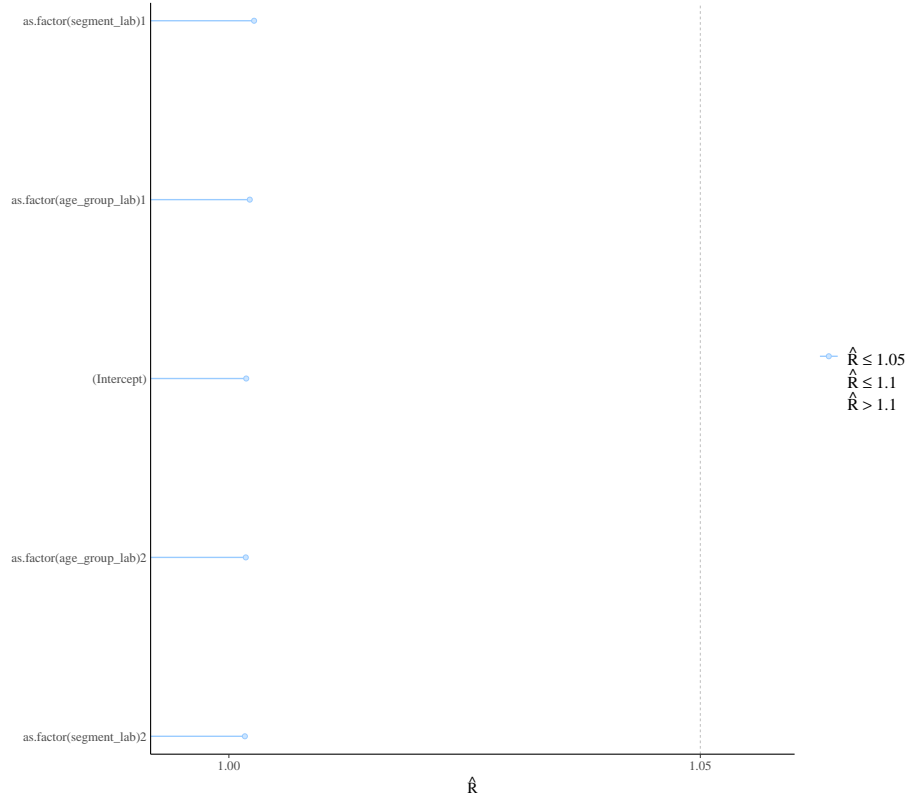

Supplementary Figure 9: **Rhat statistics for Markov Chain Monte Carlo simulations for the best-fitting generalised logistic regression model for estimating the proportion of people in bed for each age group and time period..** The Rhat is a statistic used to determine whether the chains of the simulation have converged. If all chains are at equilibrium, the split Rhat values will be the same and Rhat will be equal to 1. If the chains have not converged to a common distribution, Rhat will be greater than 1. Model coefficient abbreviations are as follows: *age\_group\_lab0* = age 0 to 5 years-old, *age\_group\_lab1* = age 5 to 14 years-old , *age\_group\_lab2* = age 15 years-old and over, *segment\_lab0* = day, *segment\_lab1* = evening and *segment\_lab2* = night.

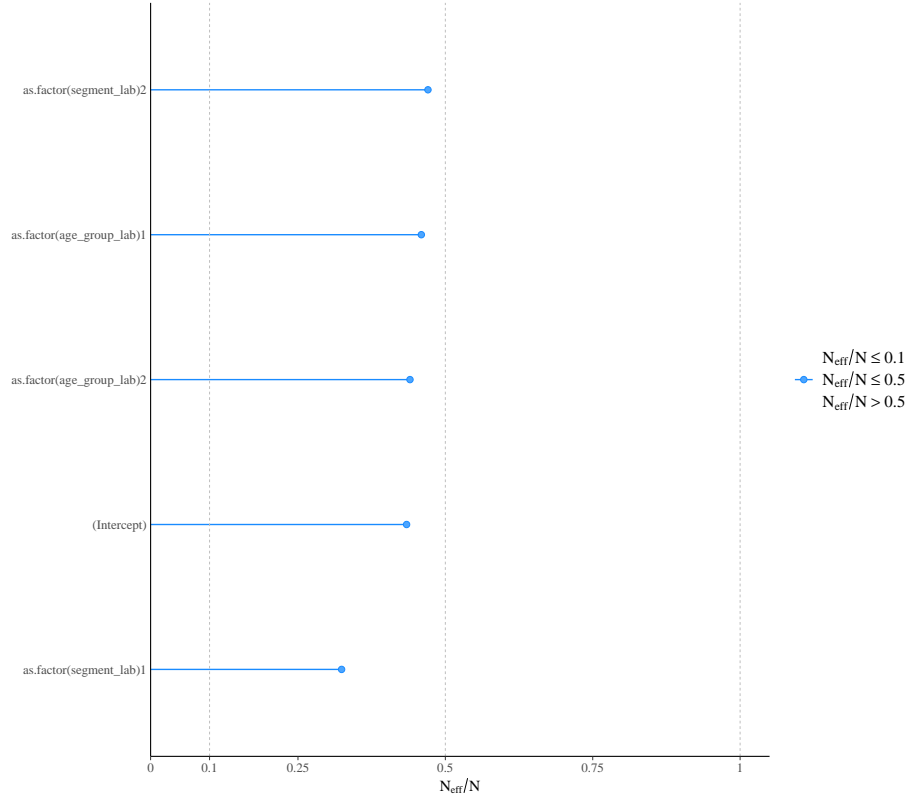

Supplementary Figure 10: **The effective same size statistics for the Markov Chain Monte Carlo simulation for the best-fitting generalised logistic regression model for estimating the proportion of people in bed for each age group and time period..** Samples will often be autocorrelated within an MCMC chain. The effective sample size ( $N_{\text{eff}}$ ) can be used to estimate the number of independent samples these correlated MCMC samples are equivalent to. If there is no autocorrelation,  $N_{\text{eff}}$  is equal to the actual number of samples ( $N$ ). If there is strong autocorrelation,  $N_{\text{eff}}$  is less than the actual number of samples. A large ratio of  $N_{\text{eff}}$  to  $N$  indicates low autocorrelation between samples and reliable posterior estimates. Model coefficient abbreviations are as follows: *age\_group\_lab0* = age 0 to 5 years-old, *age\_group\_lab1* = age 5 to 14 years-old, *age\_group\_lab2* = age 15 years-old and over, *segment\_lab0* = day, *segment\_lab1* = evening and *segment\_lab2* = night.

## 249 6 Reflexivity statement

### 250 6.1 How does this study address local research and policy 251 priorities?

252 Malaria is endemic in the Bijagos archipelago, Guinea-Bissau, despite the ex-  
253 tensive usage of insecticide-treated nets (ITNs). Targeting the transmission  
254 that escapes ITNs will be crucial for elimination efforts, and doing so requires  
255 a deep understanding of insecticide resistance, ITN usage, mosquito biting be-  
256 haviours and human activities which render exposure to potentially infectious  
257 bites. The former two have been characterised in other studies in the Bija-  
258 gos [20, 23, 40], through a collaboration between the London School of Hy-  
259 giene & Tropical Medicine (LSHTM), the Guinea-Bissau Ministry of Health,  
260 Bandim Health Project and the country’s National Malaria Control Programme  
261 (NMCP). However, collecting mosquito biting behaviour data is challenging; it  
262 is labour-intensive, costly and time-consuming as standard protocols require  
263 hourly mosquito trapping throughout the night. Hence, the simplified sampling  
264 methodology that we propose, and methodology for analysing data collected in  
265 this way, are useful for improving surveillance and characterising biting risk in  
266 this resource-limited island setting. Our transmission modelling shows how this  
267 type of surveillance can be used to guide decision-making concerning the local  
268 use of indoor vector control interventions.

### 269 6.2 How were researchers from Guinea-Bissau involved in 270 the study?

271 Researchers from the two institutions in Guinea-Bissau - Bandim Health Project  
272 and Ministry of Health (FB and ETdS) - and the field assistants (who are from  
273 the Bijagos archipelago) provided extremely useful local insights into the type  
274 of sampling approach that would be feasible and would be well-received by lo-  
275 cal communities. They voiced the concern that hourly sampling would not be  
276 feasible in the setting, especially due to the disturbance this would cause to  
277 households during the night given that it was a harvest period and individuals  
278 were working in farmland throughout the day and would be in particular need  
279 of rest at night. This was echoed amongst the field assistants as hourly sampling  
280 would require working on a rigid sleeping rota throughout the night, which was  
281 challenging in a small field team of just 6 people. This then led NC and EP  
282 to develop the segmented sampling approach, with supervision from TSC and  
283 ESS, and for NC, EP, FB and ETdS to use it to collect data on the archipelago.  
284 The field assistants also communicated with local healthcare workers to pro-  
285 vide community sensitisation for the study. This was especially important for  
286 minimising observer bias in the sleeping pattern survey. LSHTM have worked  
287 closely with the Guinea-Bissau Ministry of Health, NMCP and Bandim Health  
288 Project for over a decade on infectious diseases on the Bijagos archipelago, and  
289 have several joint research grants and publications. AL, EP, ETdS, FB, JEN,  
290 AR, PD and HH are part of this long-standing collaboration, which played a

major role in designing and implementing the study.

### **6.3 How has funding been used to support the local research team?**

Data collection was funded by the Joint Global Health Trials award (National Institute for Health and Care Research, MRC, Wellcome, and the Foreign, Commonwealth and Development Office), funder reference MR/S005013/1 and used to employ the field assistants and local researchers.

### **6.4 How are research staff who conducted data collection acknowledged?**

All colleagues who contributed directly to scientific analysis and data collection in the field are included as co-authors. The team of field assistants who constructed outdoor trapping stations, changed mosquito trap cups and recorded human sleeping activity data are included in the acknowledgements.

### **6.5 Do all members of the research partnership have access to study data?**

Yes, data for this study has been uploaded into a repository, so is accessible for all to access.

### **6.6 How was data used to develop analytical skills within the partnership?**

This was an interdisciplinary project involving field entomology, observational studies on human sleeping patterns and statistical and mathematical modelling. It was not feasible to upskill all authors on quantitative work. Some field assistants received training in morphological identification of *Aedes sp.*, *Culex sp.* and *Anopheles sp.* mosquitoes.

### **6.7 How will research products be shared to address local needs?**

The segmented sampling method and associated analysis frameworks, available in the repository for this study, will be shared so that local researchers have the resources to use this methodology to facilitate local data collection and analysis.

### **6.8 How is the leadership, contribution and ownership of this work by LMIC researchers recognised within the authorship?**

Six of the 15 authors are based in Guinea-Bissau. These authors had a variety of roles including supervision of the field survey, overseeing data collection,



325 morphological identification of *Anopheles sp.* mosquitoes or were involved in  
 326 project implementation. The first and senior authors are based in the UK.  
 327 This was deemed appropriate as the study conception and analysis was led by  
 328 NC, under supervision from TSC, ESS and AL. Important aspects of the data  
 329 collection method were based on suggestions from local researchers, who are  
 330 listed as co-authors in the study.

## 331 **6.9 How has local and regional research been taken into** 332 **account in the citations?**

333 Previous research studies, resulting from collaborations between LSHTM, the  
 334 Bandim Health Project and Ministry of Health, reported estimates of ITN usage  
 335 [20], malaria prevalence [21] and insecticide resistance [23] and used to param-  
 336 eterise the malaria transmission model.

## 337 **References**

- 338 1. Sherrard-Smith, E., Skarp, J. E., Beale, A. D., Fornadel, C., Norris, L. C.,  
 339 Moore, S. J., Mihreteab, S., Charlwood, J. D., Bhatt, S., Winskill, P., Grif-  
 340 fin, J. T. & Churcher, T. S. Mosquito feeding behavior and how it influences  
 341 residual malaria transmission across Africa. *Proceedings of the National*  
 342 *Academy of Sciences of the United States of America* **116**, 15086–15096.  
 343 ISSN: 10916490. [www.pnas.org/cgi/doi/10.1073/pnas.1820646116](http://www.pnas.org/cgi/doi/10.1073/pnas.1820646116)  
 344 (July 2019).
- 345 2. Cooke, M. K., Kahindi, S. C., Oriango, R. M., Owaga, C., Ayoma, E.,  
 346 Mabuka, D., Nyangau, D., Abel, L., Atieno, E., Awuor, S., Drakeley,  
 347 C., Cox, J. & Stevenson, J. 'A bite before bed': Exposure to malaria  
 348 vectors outside the times of net use in the highlands of western Kenya.  
 349 *Malaria Journal* **14**, 1–15. ISSN: 14752875. [https://link.springer.com/](https://link.springer.com/articles/10.1186/s12936-015-0766-4)  
 350 [articles/10.1186/s12936-015-0766-4](https://link.springer.com/articles/10.1186/s12936-015-0766-4)  
 351 <https://link.springer.com/article/10.1186/s12936-015-0766-4> (June 2015).
- 352 3. Borchers, C. & Randler, C. Sleep-wake cycle of adolescents in Côte d'Ivoire:  
 353 influence of age, gender, religion and occupation. *Chronobiology interna-*  
 354 *tional* **29**, 1366–1375. ISSN: 1525-6073. [https://pubmed.ncbi.nlm.nih.](https://pubmed.ncbi.nlm.nih.gov/23194370/)  
 355 [gov/23194370/](https://pubmed.ncbi.nlm.nih.gov/23194370/) (Dec. 2012).
- 356 4. Geissbühler, Y., Chaki, P., Emidi, B., Govella, N. J., Shirima, R., Maya-  
 357 gaya, V., Mtasiwa, D., Mshinda, H., Fillinger, U., Lindsay, S. W., Kannady,  
 358 K., De Castro, M. C., Tanner, M. & Killeen, G. F. Interdependence of do-  
 359 mestic malaria prevention measures and mosquito-human interactions in  
 360 urban Dar es Salaam, Tanzania. *Malaria Journal* **6**, 1–17. ISSN: 14752875.  
 361 [https://malariajournal.biomedcentral.com/articles/10.1186/](https://malariajournal.biomedcentral.com/articles/10.1186/1475-2875-6-126)  
 362 [1475-2875-6-126](https://malariajournal.biomedcentral.com/articles/10.1186/1475-2875-6-126) (Sept. 2007).

- 363 5. Killeen, G. F., Kihonda, J., Lyimo, E., Oketch, F. R., Kotas, M. E., Math-  
 364 enge, E., Schellenberg, J. A., Lengeler, C., Smith, T. A. & Drakeley, C. J.  
 365 Quantifying behavioural interactions between humans and mosquitoes:  
 366 Evaluating the protective efficacy of insecticidal nets against malaria trans-  
 367 mission in rural Tanzania. *BMC Infectious Diseases* **6**, 161. ISSN: 14712334.  
 368 <https://pmc.ncbi.nlm.nih.gov/articles/PMC1657018/> (Nov. 2006).
- 369 6. Seyoum, A., Sikaala, C. H., Chanda, J., Chinula, D., Ntamatungiro, A. J.,  
 370 Hawela, M., Miller, J. M., Russell, T. L., Brit, O. J. & Killeen, G. F. Human  
 371 exposure to anopheline mosquitoes occurs primarily indoors, even for users  
 372 of insecticide-treated nets in Luangwa Valley, South-east Zambia. *Parasites*  
 373 *and Vectors* **5**, 1–10. ISSN: 17563305. [https://parasitesandvectors.](https://parasitesandvectors.biomedcentral.com/articles/10.1186/1756-3305-5-101)  
 374 [biomedcentral.com/articles/10.1186/1756-3305-5-101](https://parasitesandvectors.biomedcentral.com/articles/10.1186/1756-3305-5-101) (May 2012).
- 375 7. Beale, A. D., Pedrazzoli, M., Gonçalves, B. D. S. B., Beijamini, F., Duarte,  
 376 N. E., Egan, K. J., Knutson, K. L., Schantz, M. V. & Roden, L. C. Com-  
 377 parison between an African town and a neighbouring village shows delayed,  
 378 but not decreased, sleep during the early stages of urbanisation. *Scientific*  
 379 *Reports 2017 7:1* **7**, 1–10. ISSN: 2045-2322. [https://www.nature.com/](https://www.nature.com/articles/s41598-017-05712-3)  
 380 [articles/s41598-017-05712-3](https://www.nature.com/articles/s41598-017-05712-3) (July 2017).
- 381 8. Bradley, J., Lines, J., Fuseini, G., Schwabe, C., Monti, F., Slotman, M.,  
 382 Vargas, D., Garcia, G., Hergott, D. & Kleinschmidt, I. Outdoor biting  
 383 by Anopheles mosquitoes on Bioko Island does not currently impact on  
 384 malaria control. *Malaria Journal* **14**, 1–8. ISSN: 14752875. [https://link.](https://link.springer.com/articles/10.1186/s12936-015-0679-2)  
 385 [springer.com/articles/10.1186/s12936-015-0679-2](https://link.springer.com/articles/10.1186/s12936-015-0679-2)  
 386 <https://link.springer.com/article/10.1186/s12936-015-0679-2> (Apr.  
 387 2015).
- 388 9. Huho, B., Briët, O., Seyoum, A., Sikaala, C., Bayoh, N., Gimnig, J., Okumu,  
 389 F., Diallo, D., Abdulla, S., Smith, T. & Killeen, G. Consistently high esti-  
 390 mates for the proportion of human exposure to malaria vector populations  
 391 occurring indoors in rural Africa. *International Journal of Epidemiology*  
 392 **42**, 235–247. ISSN: 0300-5771. [https://dx.doi.org/10.1093/ije/](https://dx.doi.org/10.1093/ije/dys214)  
 393 [dys214](https://dx.doi.org/10.1093/ije/dys214) (Feb. 2013).
- 394 10. Moiroux, N., Damien, G. B., Egrot, M., Djenontin, A., Chandre, F., Corbel,  
 395 V., Killeen, G. F. & Pennetier, C. Human Exposure to Early Morning  
 396 Anopheles funestus Biting Behavior and Personal Protection Provided by  
 397 Long-Lasting Insecticidal Nets. *PLOS ONE* **9**, e104967. ISSN: 1932-6203.  
 398 [https://journals.plos.org/plosone/article?id=10.1371/journal.](https://journals.plos.org/plosone/article?id=10.1371/journal.pone.0104967)  
 399 [pone.0104967](https://journals.plos.org/plosone/article?id=10.1371/journal.pone.0104967) (Aug. 2014).
- 400 11. Monroe, A., Asamoah, O., Lam, Y., Koenker, H., Psychas, P., Lynch, M.,  
 401 Ricotta, E., Hornston, S., Berman, A. & Harvey, S. A. Outdoor-sleeping  
 402 and other night-time activities in northern Ghana: Implications for resid-  
 403 ual transmission and malaria prevention. *Malaria Journal* **14**, 1–12. ISSN:  
 404 14752875. [https://link.springer.com/articles/10.1186/s12936-](https://link.springer.com/articles/10.1186/s12936-015-0543-4)  
 405 [015-0543-4](https://link.springer.com/articles/10.1186/s12936-015-0543-4)  
 406 <https://link.springer.com/article/10.1186/s12936-015-0543-4> (Jan. 2015).

- 407 12. Ototo, E. N., Mbugi, J. P., Wanjala, C. L., Zhou, G., Githeko, A. K.  
408 & Yan, G. Surveillance of malaria vector population density and biting  
409 behaviour in western Kenya. *Malaria Journal* **14**, 1–10. ISSN: 14752875.  
410 [https://link.springer.com/articles/10.1186/s12936-015-0763-](https://link.springer.com/articles/10.1186/s12936-015-0763-7)  
411 [7%20https://link.springer.com/articles/10.1186/s12936-015-](https://link.springer.com/articles/10.1186/s12936-015-0763-7)  
412 [0763-7](https://link.springer.com/articles/10.1186/s12936-015-0763-7) (June 2015).
- 413 13. Russell, T. L., Govella, N. J., Azizi, S., Drakeley, C. J., Kachur, S. P. &  
414 Killeen, G. F. Increased proportions of outdoor feeding among residual  
415 malaria vector populations following increased use of insecticide-treated  
416 nets in rural Tanzania. *Malaria Journal* **10**, 1–10. ISSN: 14752875. <https://link.springer.com/articles/10.1186/1475-2875-10-80>  
417 <https://link.springer.com/articles/10.1186/1475-2875-10-80>  
418 <https://link.springer.com/articles/10.1186/1475-2875-10-80> (Apr.  
419 2011).
- 420 14. Griffin, J. T., Hollingsworth, T. D., Okell, L. C., Churcher, T. S., White,  
421 M., Hinsley, W., Bousema, T., Drakeley, C. J., Ferguson, N. M., Basáñez,  
422 M.-G. & Ghani, A. C. Reducing Plasmodium falciparum Malaria Trans-  
423 mission in Africa: A Model-Based Evaluation of Intervention Strategies.  
424 *PLoS Medicine* **7** (ed Krishna, S.) e1000324. ISSN: 1549-1676. [https://](https://dx.plos.org/10.1371/journal.pmed.1000324)  
425 [dx.plos.org/10.1371/journal.pmed.1000324](https://dx.plos.org/10.1371/journal.pmed.1000324) (Aug. 2010).
- 426 15. Hellewell, J., Slater, H., Unwin, J. & Watson, O. J. *ICDMM: Deterministic*  
427 *malaria odin model* 2024.
- 428 16. Griffin, J. T., Ferguson, N. M. & Ghani, A. C. Estimates of the chang-  
429 ing age-burden of Plasmodium falciparum malaria disease in sub-Saharan  
430 Africa. *Nature Communications* 2014 5:1 **5**, 1–10. ISSN: 2041-1723. [https://](https://www.nature.com/articles/ncomms4136)  
431 [www.nature.com/articles/ncomms4136](https://www.nature.com/articles/ncomms4136) (Feb. 2014).
- 432 17. Slater, Foy, Kobylinski, Chaccour, Watson, Hellewell, Aljayyousi, Bousema,  
433 Burrows, D'Alessandro, Alout, Ter Kuile, Walker, Ghani & Smit. Iver-  
434 mectin as a novel complementary malaria control tool to reduce inci-  
435 dence and prevalence: a modelling study. *The Lancet. Infectious diseases*  
436 **20**, 498–508. ISSN: 1474-4457. [https://pubmed.ncbi.nlm.nih.gov/](https://pubmed.ncbi.nlm.nih.gov/31948767/)  
437 [31948767/](https://pubmed.ncbi.nlm.nih.gov/31948767/) (Apr. 2020).
- 438 18. Le Menach, A., Takala, S., McKenzie, F. E., Perisse, A., Harris, A., Fla-  
439 hault, A. & Smith, D. L. An elaborated feeding cycle model for reductions  
440 in vectorial capacity of night-biting mosquitoes by insecticide-treated nets.  
441 *Malaria Journal* **6**, 10. ISSN: 14752875. [/pmc/articles/PMC1794417/](https://pmc/articles/PMC1794417/)  
442 [https://pmc/articles/PMC1794417/?report=abstract%20https://www.ncbi.](https://pmc/articles/PMC1794417/?report=abstract%20https://www.ncbi.nlm.nih.gov/pmc/articles/PMC1794417/)  
443 [nlm.nih.gov/pmc/articles/PMC1794417/](https://pmc/articles/PMC1794417/) (2007).
- 444 19. Sherrard-Smith, E., Winskill, P., Hamlet, A., Ngufor, C., N'Guessan, R.,  
445 Guelbeogo, M. W., Sanou, A., Nash, R. K., Hill, A., Russell, E. L., Wood-  
446 bridge, M., Tungu, P., Kont, M. D., Mclean, T., Fornadel, C., Richard-  
447 son, J. H., Donnelly, M. J., Staedke, S. G., Gonahasa, S., Protopopoff,  
448 N., Rowland, M. & Churcher, T. S. Optimising the deployment of vec-  
449 tor control tools against malaria: a data-informed modelling study. *The*  
450 *Lancet Planetary Health* **6**, e100–e109. ISSN: 25425196. <http://www>.

- thelancet.com/article/S2542519621002965/fulltext%20http://  
www.thelancet.com/article/S2542519621002965/abstract%20https://  
www.thelancet.com/journals/lanplh/article/PIIS2542-5196(21)  
00296-5/abstract (Feb. 2022).
20. Hutchins, H., Power, G., Ant, T., Teixeira da Silva, E., Goncalves, A.,  
Rodrigues, A., Logan, J., Mabey, D. & Last, A. A survey of knowledge,  
attitudes and practices regarding malaria and bed nets on Bubaque Island,  
Guinea-Bissau. *Malaria Journal* **19**. ISSN: 14752875 (Dec. 2020).
  21. McGregor, D., da Silva, E. T., Grignard, L., Goncalves, A., Vasileva,  
H., Mabey, D. & Last, A. The Epidemiology of Plasmodium falciparum  
Malaria in the Bijagos Islands of Guinea-Bissau. *The American Jour-  
nal of Tropical Medicine and Hygiene* **104**, 2117. ISSN: 14761645. /pmc/  
articles/PMC8176492/%20/pmc/articles/PMC8176492/?report=abstract%  
20https://www.ncbi.nlm.nih.gov/pmc/articles/PMC8176492/ (June  
2021).
  22. Wu, L., Van Den Hoogen, L. L., Slater, H., Walker, P. G., Ghani, A. C.,  
Drakeley, C. J. & Okell, L. C. Comparison of diagnostics for the detection  
of asymptomatic Plasmodium falciparum infections to inform control and  
elimination strategies. *Nature* *2015 528:7580* **528**, S86–S93. ISSN: 1476-  
4687. <https://www.nature.com/articles/nature16039> (Dec. 2015).
  23. Moss, S., Jones, R. T., Pretorius, E., da Silva, E. T., Higgins, M., Kristan,  
M., Acford-Palmer, H., Collins, E. L., Rodrigues, A., Krishna, S., Clark,  
T. G., Last, A. & Campino, S. Phenotypic evidence of deltamethrin re-  
sistance and identification of selective sweeps in Anopheles mosquitoes on  
the Bijagós Archipelago, Guinea-Bissau. *Scientific Reports* *2024 14:1* **14**,  
1–12. ISSN: 2045-2322. [https://www.nature.com/articles/s41598-  
024-73996-3](https://www.nature.com/articles/s41598-024-73996-3) (Oct. 2024).
  24. Dabire, K. R., Diabaté, A., Paré-Toé, L., Rouamba, J., Ouari, A., Fonte-  
nille, D. & Baldet, T. Year to year and seasonal variations in vector bio-  
nomics and malaria transmission in a humid savannah village in west Burk-  
ina Faso. *Journal of Vector Ecology* **33**, 70–75 (2008).
  25. Dia, I., Diop, T., Rakotoarivony, I., Kengne, P. & Fontenille, D. Bionomics  
of Anopheles gambiae Giles, An. arabiensis Patton, An. funestus Giles and  
An. nili (Theobald) (Diptera: Culicidae) and Transmission of Plasmodium  
falciparum in a Sudano-Guinean Zone (Ngari, Senegal). *Journal of Medical  
Entomology* **40**, 279–283. ISSN: 0022-2585. [https://dx.doi.org/10 .  
1603/0022-2585-40.3.279](https://dx.doi.org/10.1603/0022-2585-40.3.279) (May 2003).
  26. Ndiath, M. O., Brengues, C., Konate, L., Sokhna, C., Boudin, C., Trape,  
J. F. & Fontenille, D. Dynamics of transmission of Plasmodium falciparum  
by Anopheles arabiensis and the molecular forms M and S of Anophe-  
les gambiae in Dielmo, Senegal. *Malaria Journal* **7**, 1–6. ISSN: 14752875.  
[https://link.springer.com/articles/10 . 1186/1475 - 2875 - 7 -  
136](https://link.springer.com/articles/10.1186/1475-2875-7-136)%20https://link.springer.com/article/10.1186/1475-2875-7-  
136 (July 2008).

- 495 27. Marrama, L., Jambou, R., Rakotoarivony, I., Tsi, J. M. P., Duchemin, J. B.,  
496 Laventure, S., Mouchet, J. & Roux, J. Malaria transmission in Southern  
497 Madagascar: influence of the environment and hydro-agricultural works  
498 in sub-arid and humid regions: Part 1. Entomological investigations. *Acta*  
499 *Tropica* **89**, 193–203. ISSN: 0001-706X (Jan. 2004).
- 500 28. Tirados, I., Costantini, C., Gibson, G. & Torr, S. J. Blood-feeding be-  
501 haviour of the malarial mosquito *Anopheles arabiensis*: implications for  
502 vector control. *Medical and veterinary entomology* **20**, 425–437. ISSN: 0269-  
503 283X. <https://pubmed.ncbi.nlm.nih.gov/17199754/> (Dec. 2006).
- 504 29. Gu, W., Mbogo, C. M., Githure, J. I., Regens, J. L., Killeen, G. F., Swalm,  
505 C. M., Yan, G. & Beier, J. C. Low recovery rates stabilize malaria endemic-  
506 ity in areas of low transmission in coastal Kenya. *Acta Tropica* **86**, 71–81.  
507 ISSN: 0001706X. <https://pubmed.ncbi.nlm.nih.gov/12711106/> (Apr.  
508 2003).
- 509 30. Garrett-Jones, C. & Shidrawi, G. R. Malaria vectorial capacity of a pop-  
510 ulation of *Anopheles gambiae*: An exercise in epidemiological entomology.  
511 *Bulletin of the World Health Organization* **40**, 531. ISSN: 00429686. <https://pmc.ncbi.nlm.nih.gov/articles/PMC2556109/> (Apr. 1969).
- 513 31. Costantini, C., Li, S. G., Della Torre, A., Sagnon, N., Coluzzi, M. & Tay-  
514 lor, C. E. Density, survival and dispersal of *Anopheles gambiae* complex  
515 mosquitoes in a west African Sudan savanna village. *Medical and veteri-  
516 nary entomology* **10**, 203–219. ISSN: 0269-283X. <https://pubmed.ncbi.nlm.nih.gov/8887330/> (1996).
- 518 32. GARRETT-JONES, C. & GRAB, B. The assessment of insecticidal impact  
519 on the malaria mosquito’s vectorial capacity, from data on the proportion  
520 of parous females. *Bulletin of the World Health Organization* **31**, 71. ISSN:  
521 00429686. <https://pmc.ncbi.nlm.nih.gov/articles/PMC2555159/>  
522 (1964).
- 523 33. Gillies, M. T. OBSERVATIONS ON NULLIPAROUS AND PAROUS RATES  
524 IN SOME COMMON EAST AFRICAN MOSQUITOES. *Annals of tropi-  
525 cal medicine and parasitology* **57**, 435–442. ISSN: 0003-4983. <https://pubmed.ncbi.nlm.nih.gov/14101933/> (1963).
- 527 34. Gillies, M. T. & Wilkes, T. J. A study of the age-composition of popula-  
528 tions of *Anopheles gambiae* Giles and *A. funestus* Giles in North-Eastern  
529 Tanzania. *Bulletin of entomological research* **56**, 237–262. ISSN: 0007-4853.  
530 <https://pubmed.ncbi.nlm.nih.gov/5854754/> (1965).
- 531 35. Krafur, E. S. & Garrett-Jones, C. The survival in nature of *Wuchereria*-  
532 infected *Anopheles funestus* Giles in North-eastern Tanzania. *Transactions*  
533 *of the Royal Society of Tropical Medicine and Hygiene* **71**, 155–160. ISSN:  
534 0035-9203 (Jan. 1977).

- 535 36. Appawu, M., Owusu-Agyei, S., Dadzie, S., Asoala, V., Anto, F., Koram,  
536 K., Rogers, W., Nkrumah, F., Hoffman, S. L. & Fryauff, D. J. Malaria  
537 transmission dynamics at a site in northern Ghana proposed for testing  
538 malaria vaccines. *Tropical Medicine & International Health* **9**, 164–170.  
539 ISSN: 1365-3156. [https://onlinelibrary.wiley.com/doi/full/10.](https://onlinelibrary.wiley.com/doi/full/10.1046/j.1365-3156.2003.01162.x)  
540 [1046/j.1365-3156.2003.01162.x](https://onlinelibrary.wiley.com/doi/abs/10.1046/j.1365-3156.2003.01162.x)  
541 <https://onlinelibrary.wiley.com/doi/10.1046/j.1365-3156.2003.01162.x>  
542 (Jan. 2004).
- 544 37. Mendis, C., Jacobsen, J. L., Gamage-Mendis, A., Bule, E., Dgedge, M.,  
545 Thompson, R., Cuamba, N., Barreto, J., Begtrup, K., Sinden, R. E. &  
546 Høgh, B. *Anopheles arabiensis* and *An. funestus* are equally important  
547 vectors of malaria in Matola coastal suburb of Maputo, southern Mozam-  
548 bique. *Medical and veterinary entomology* **14**, 171–180. ISSN: 0269-283X.  
549 <https://pubmed.ncbi.nlm.nih.gov/10872861/> (2000).
- 550 38. Killeen, G. F., McKenzie, F. E., Foy, B. D., Schieffelin, C., Billingsley,  
551 P. F. & Beier, J. C. The potential impact of integrated malaria transmis-  
552 sion control on entomologic inoculation rate in highly endemic areas. *The*  
553 *American journal of tropical medicine and hygiene* **62**, 545–551. ISSN: 0002-  
554 9637. [http://ovidsp.ovid.com/ovidweb.cgi?T=JS&PAGE=reference&](http://ovidsp.ovid.com/ovidweb.cgi?T=JS&PAGE=reference&D=medc&NEWS=N&AN=11289662)  
555 [D=medc&NEWS=N&AN=11289662](http://ovidsp.ovid.com/ovidweb.cgi?T=JS&PAGE=reference&D=medc&NEWS=N&AN=11289662) (2000).
- 556 39. Killeen, G. F. & Smith, T. A. Exploring the contributions of bed nets,  
557 cattle, insecticides and excitorepellency to malaria control: a deterministic  
558 model of mosquito host-seeking behaviour and mortality. *Transactions of*  
559 *the Royal Society of Tropical Medicine and Hygiene* **101**, 867–880. ISSN:  
560 0035-9203 (Sept. 2007).
- 561 40. Moss, S., Pretorius, E., Ceesay, S., Hutchins, H., da Silva, E. T., Ndiath,  
562 M. O., Jones, R. T., Vasileva, H., Phelan, J., Acford-Palmer, H., Collins,  
563 E., Rodrigues, A., Krishna, S., Clark, T. G., Last, A. & Campino, S. Ge-  
564 nomic surveillance of *Anopheles* mosquitoes on the Bijagós Archipelago  
565 using custom targeted amplicon sequencing identifies mutations associated  
566 with insecticide resistance. *Parasites & Vectors* **17**, 10. ISSN: 1756-3305.  
567 [https://parasitesandvectors.biomedcentral.com/articles/10.](https://parasitesandvectors.biomedcentral.com/articles/10.1186/s13071-023-06085-5)  
568 [1186/s13071-023-06085-5](https://parasitesandvectors.biomedcentral.com/articles/10.1186/s13071-023-06085-5) (Jan. 2024).
